# Supplementary material for: Significant enhancement of energy storage density and polarization in self-assembled PbZrO3 : NiO nano-columnar composite films
Source: Royal Society of Chemistry journal article supplement (doi:10.1039/c8nr08887j), 2018-12-20
Supplement: c8nr08887j1.pdf [file c8nr08887j1.pdf]

## Supporting Information

### Significant enhancement of energy storage density and polarization in self-assembled $\text{PbZrO}_3\text{:NiO}$ nano-columnar composite film

Mingjing Chen<sup>1,2</sup>, Xingkun Ning<sup>1,\*</sup>, Shufang Wang<sup>1</sup> and Guangsheng Fu<sup>1</sup>

Mingjing Chen, Prof. Xingkun Ning, Prof. Shufang Wang, Prof. Guangsheng Fu,  
Hebei Key Lab of Optic-electronic Information and Materials, The College of Physics  
Science and Technology, Hebei University, Baoding 071002, People's Republic of  
China

Mingjing Chen

College of Quality and Technical Supervision, Hebei University, Baoding 071002,  
People's Republic of China

#### XPS characterization of $\text{PbZrO}_3\text{:NiO}$ nanocomposites

XPS method has been used to confirm the exact composition ratios. The Ni 2p have been used to calculate the ratio of the NiO. The results show that the deposition time has to be conformity with the volume ratio of NiO.

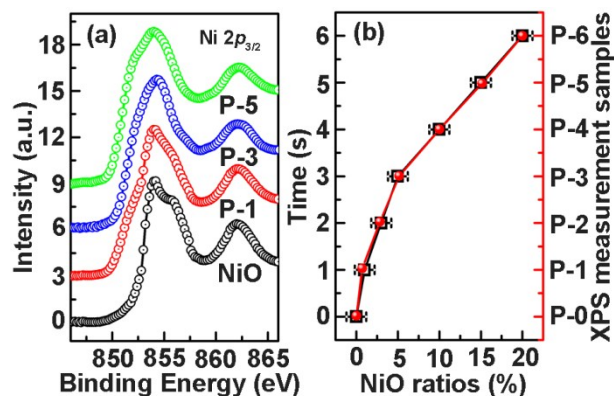

**Figure S1.** (a) Ni  $2p_{3/2}$  spectra for the pure NiO films, P-1, P-3, P-5 nanocolunar composites. (b) NiO composite ratio versus the deposition time and the XPS data.

### HAADF images of PbZrO<sub>3</sub>:NiO nanocomposite films

From the interfacial region, we achieve the average diameter of NiO nanocolumnar is around 2~7 nm within the PZO matrix for the nanocomposite film. From the Figure S3, it is clear that the average diameter of NiO and the number of the NiO nanocolumnars increases with the addition of NiO.

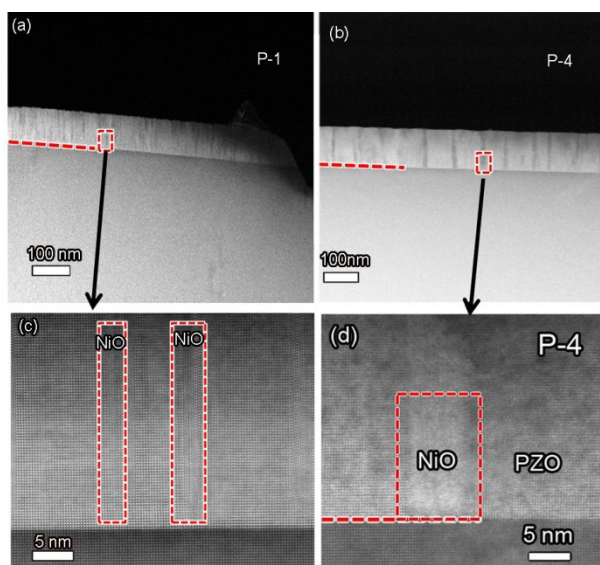

**Figure S2.** (a)-(c) The Low-magnification HAADF images of the P-1 and P-4 nanocolumns, respectively. (d) High-resolution image of a single NiO nanocolumnar within the PZO matrix for the corresponding nanocolumn composites.

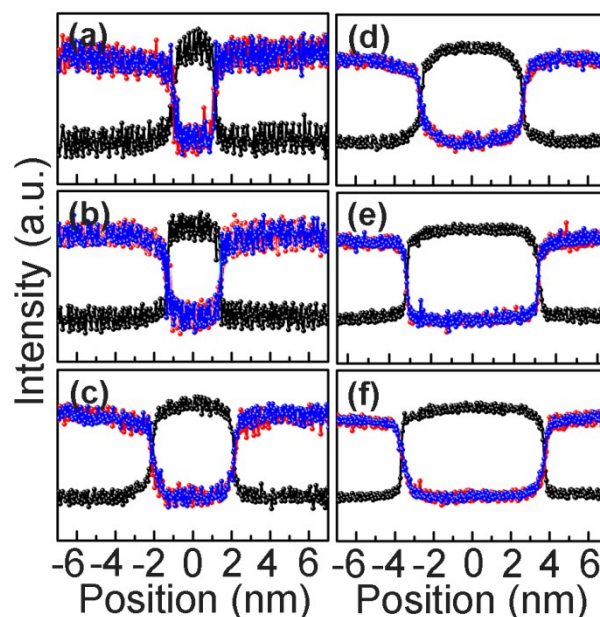

**Figure S3.** (a)-(f) STEM-EDS line scans for Pb, Zr and Ni atom in the interfacial region around the NiO nanocolumnar (the black, red and blue dot represents Ni atom, Pb atom and Zr atom, respectively.) for the P-1, P-2, P-3, P-4, P-5 and P-6 PZO:NiO nanocolumnar composites, respectively.

#### **Leakage current density for $\text{PbZrO}_3\text{:NiO}$ nanocomposites**

The leakage current conduction for these samples have been shown in Figure S4. Figure S4 shows leakage current density of the PZO:NiO nanocomposites as a function of increasing NiO ratio. The lowest leakage current density capacitor of the pure PZO thin film is about  $9.5 \times 10^{-3} \text{ A/cm}^2$  and breakdown occurred at  $\sim 550 \text{ kV/cm}$ . The addition of NiO can decrease the leakage current density. However, when NiO ratio increases beyond 5%, PZO:NiO nanocomposites capacitor can lead to higher leakage current density.

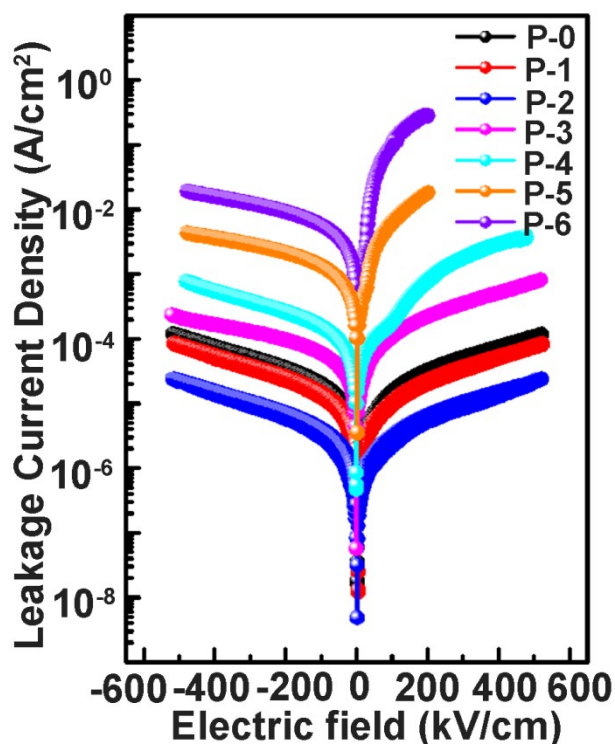

**Figure S4.** (a) The leakage current density of the PZO:NiO nanocomposites with various NiO ratios.

- [1] Chaudhuri AB, Arredondo M, Hahnel A, Morelli A, Becker M, Alexe M, Vrejoiu I, Epitaxial strain stabilization of a ferroelectric phase in PbZrO<sub>3</sub> thin films. PHYSICAL REVIEW B 2011;84:054112.
- [2] Koo CY, Eum YJ, Hwang S-O, Jung H-S, Yeum J-H, Lee J-Y, Lee HY, Development of High Energy Capacitors Using La-Doped PbZrO<sub>3</sub> Anti-Ferroelectric Thin Films. Ferroelectrics 2014;465:89-95.
- [3] Liu YJ, Hao XH, Zhou J, Xu JZ, An SL, Effects of raw materials on microstructure and dielectric properties of PbZrO<sub>3</sub> antiferroelectric thin films prepared via sol-gel process. Journal of Alloys and Compounds 2011;509:8779–8782.
